# Supplementary material
Source: PubMed Central journal article supplement (PMC7231653)

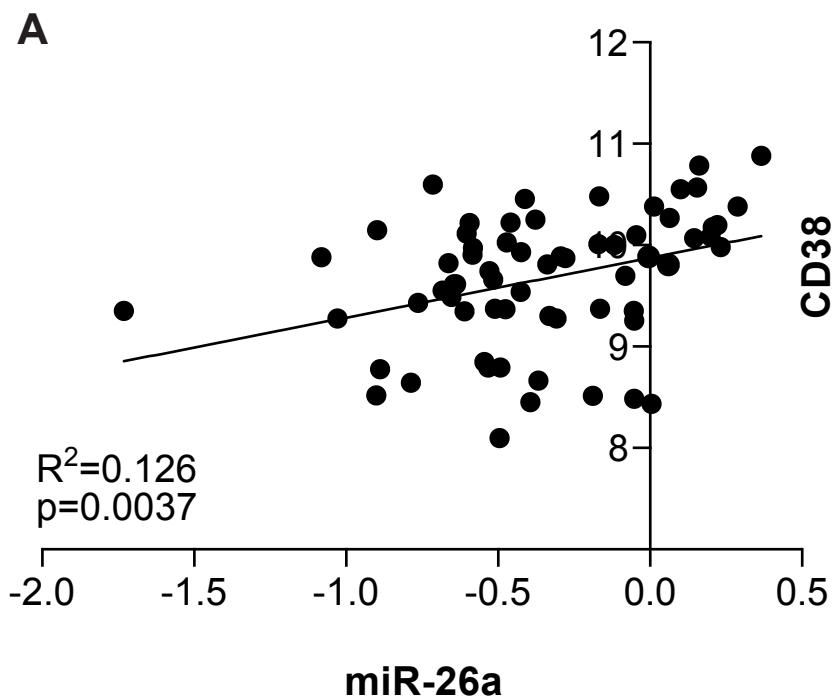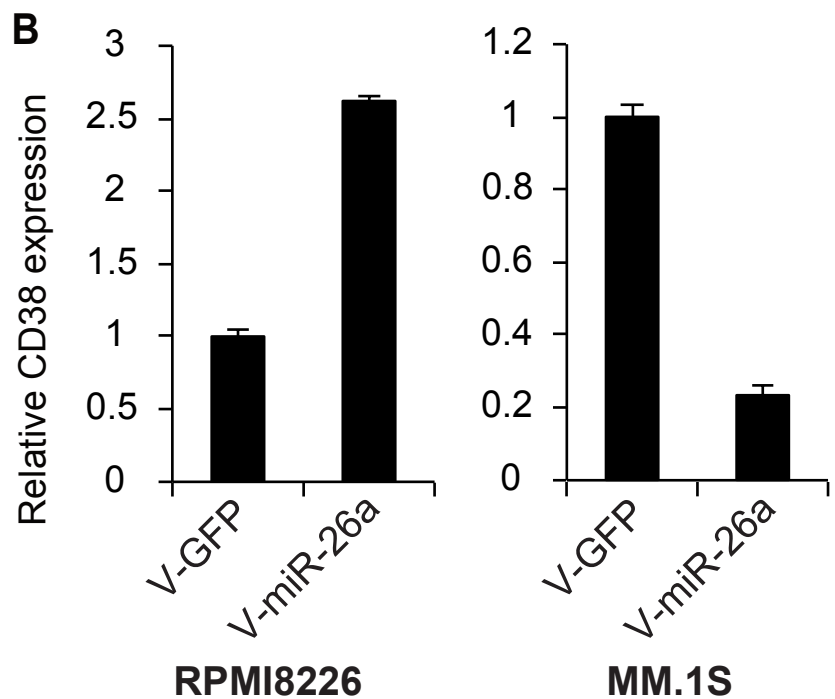

Supplement: NIHMS1579149-supplement-3.pdf [file NIHMS1579149-supplement-3.pdf]

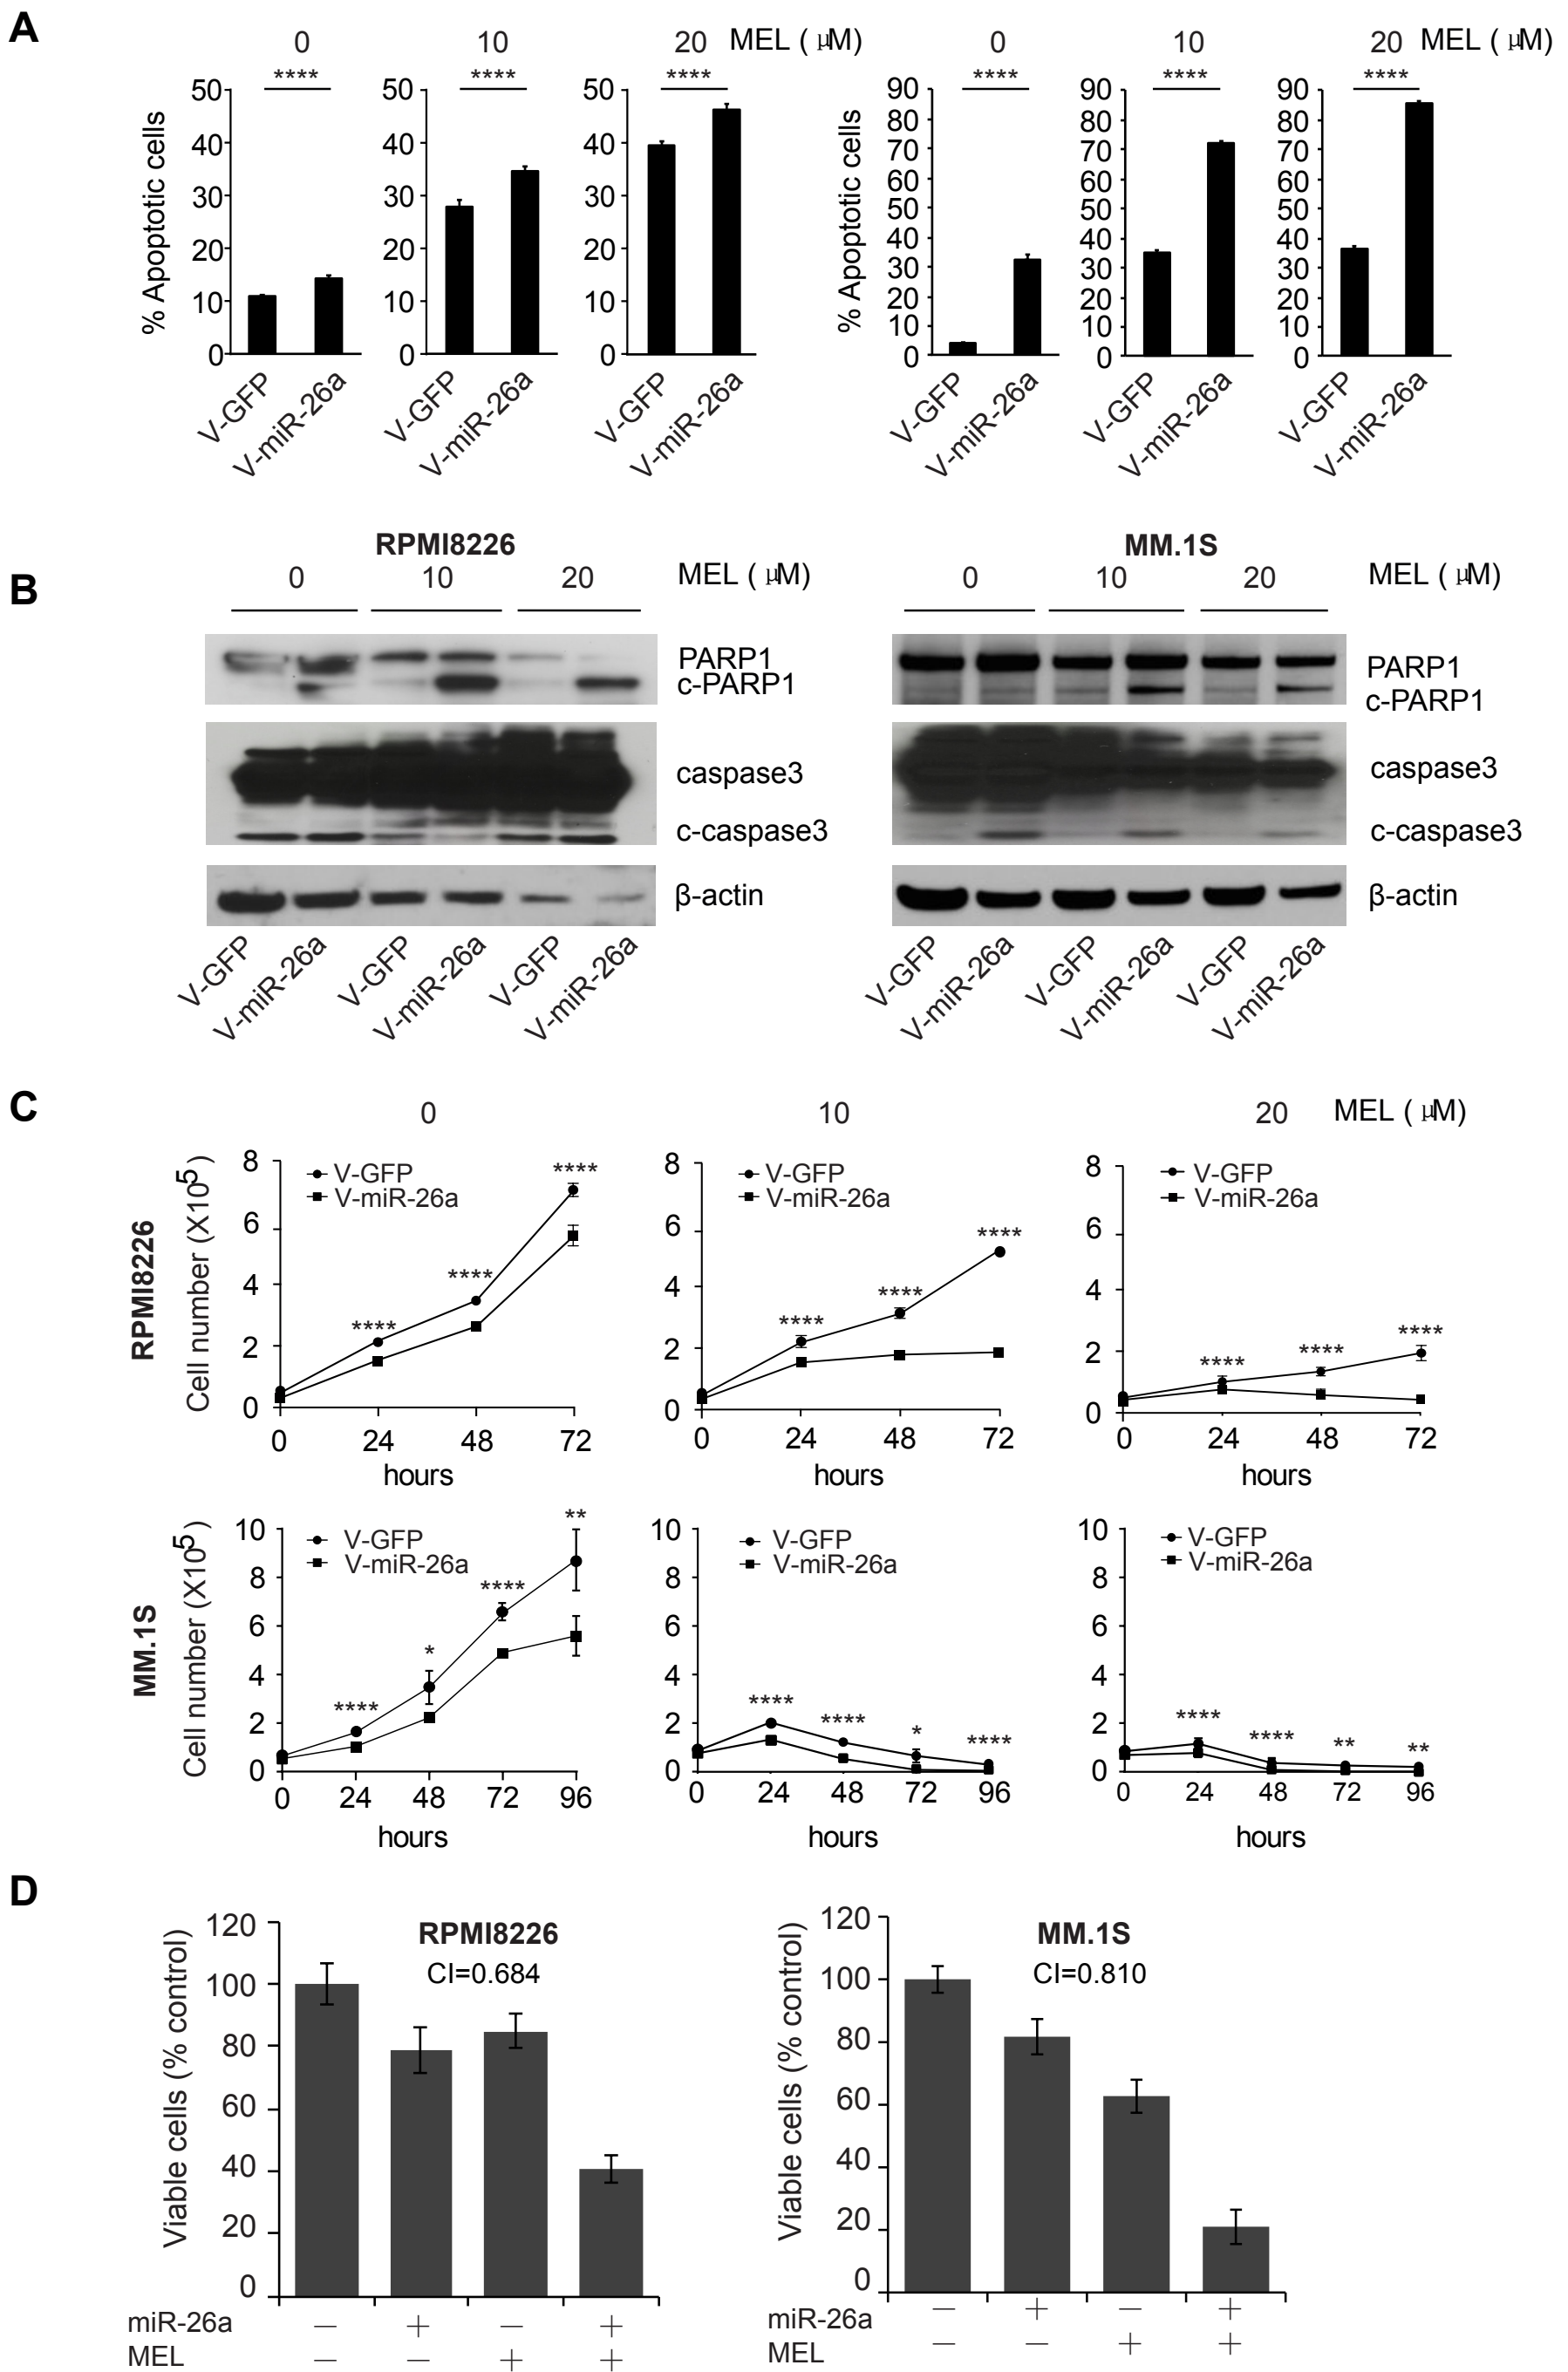

Supplement: NIHMS1579149-supplement-4.pdf [file NIHMS1579149-supplement-4.pdf]

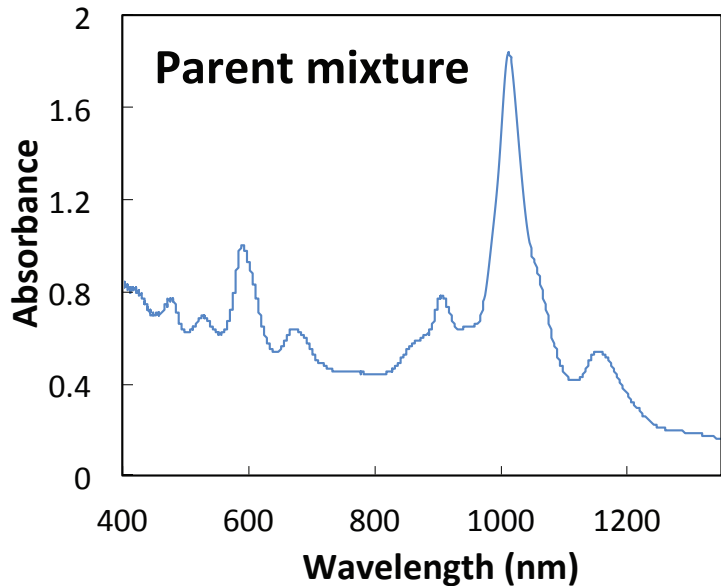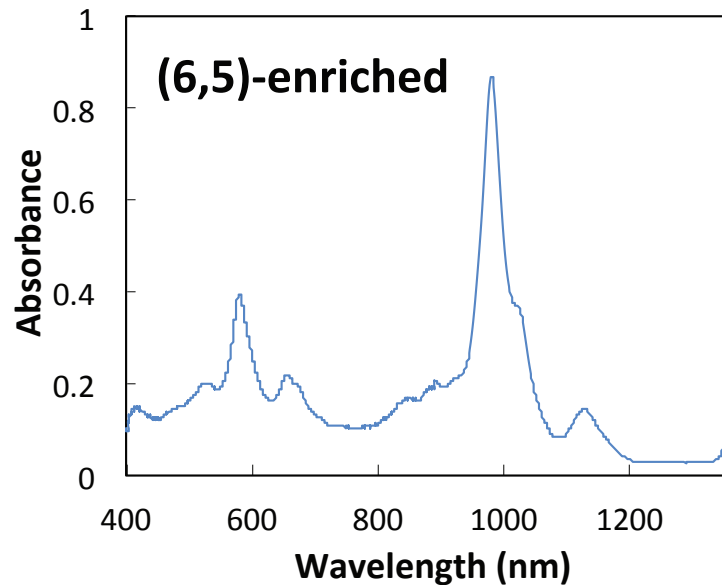

**Hu. et al Figure S3**

Supplement: NIHMS1579149-supplement-5.pdf [file NIHMS1579149-supplement-5.pdf]

A

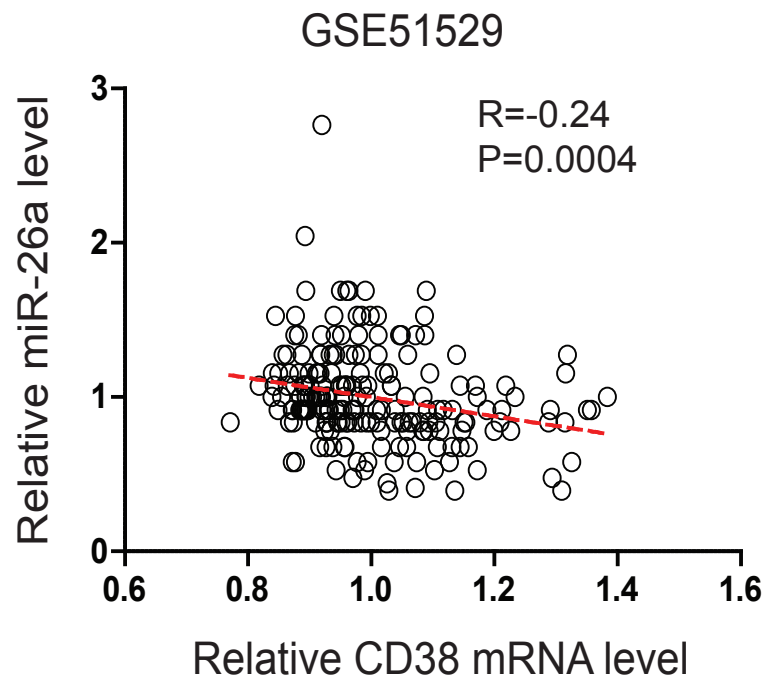

B

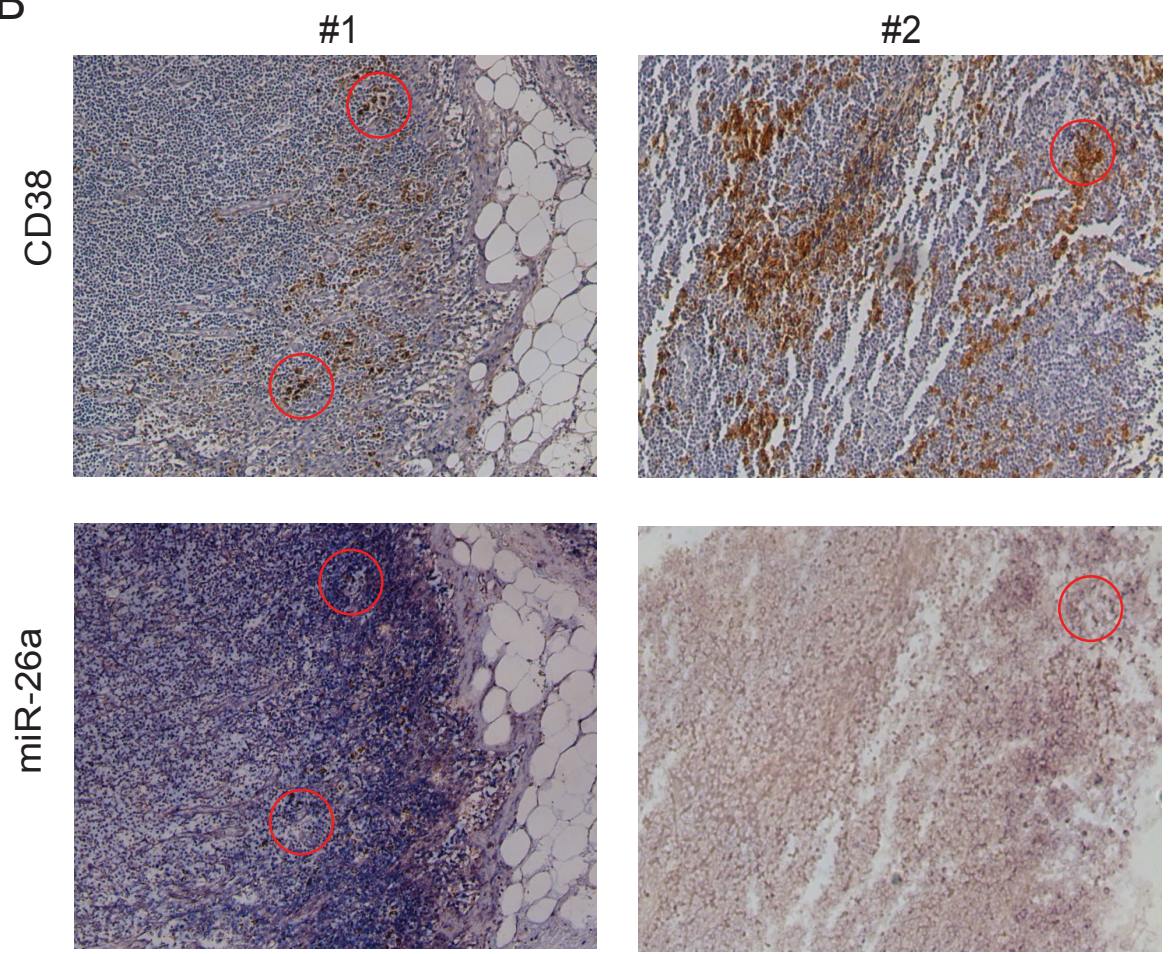

Hu et al Figure S4

Supplement: NIHMS1579149-supplement-6.pdf [file NIHMS1579149-supplement-6.pdf]
